# Supplementary material
Source: PubMed Central journal article supplement (PMC4463196)
Supplement: JCI77983sd.pdf [file JCI77983sd.pdf]

## Supplemental Figures

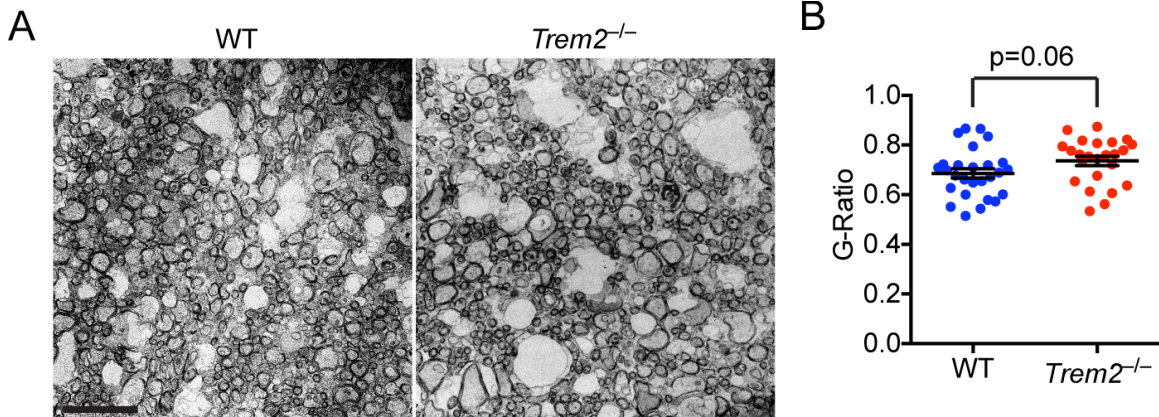

**Supplemental Figure 1. WT and *Trem2*<sup>-/-</sup> mice show similar levels of remyelination after 4 weeks of cuprizone feeding.** WT and *Trem2*<sup>-/-</sup> mice were fed with a cuprizone diet for 4 weeks followed by a normal diet for 2 weeks. Remyelination in corpus callosum was examined by EM. **(A)** Representative EM images of corpus callosum of WT and *Trem2*<sup>-/-</sup> mice. **(B)** Myelin thickness was assessed by G-ratio.

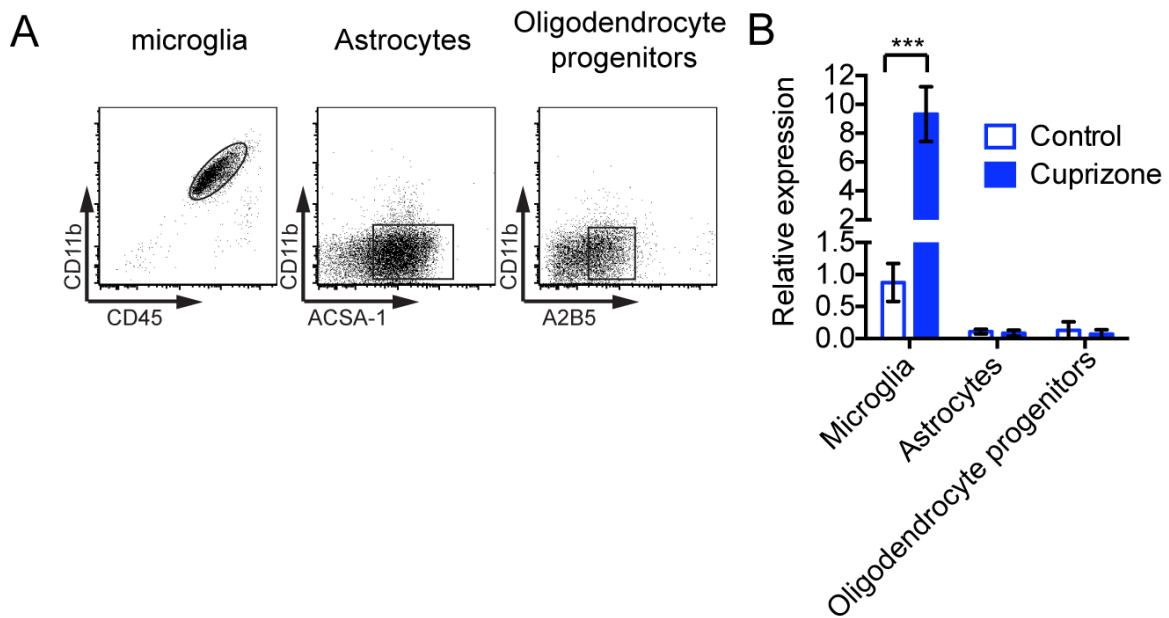

**Supplemental Figure 2. *Trem2* is highly expressed by microglia but not astrocytes or oligodendrocyte progenitors during cuprizone treatment.**

Microglia, astrocytes and oligodendrocyte progenitors were FACS-purified from WT mice that were fed a normal diet or a cuprizone diet for 4 weeks. Microglia, astrocytes and oligodendrocytes were identified as CD11b<sup>+</sup>CD45<sup>lo</sup>, CD45<sup>-</sup>ACSA-1<sup>+</sup> and CD45<sup>-</sup>A2B5<sup>+</sup> respectively. **(A)** Gating strategy used for FACS-sorting each cell type. **(B)** *Trem2* expression by microglia, astrocytes and oligodendrocyte progenitors was determined by qPCR.

**Supplemental Table 1.** qPCR primers.

| <b>Gene</b>  | <b>5'</b>             | <b>3'</b>                 |
|--------------|-----------------------|---------------------------|
| <i>Trem2</i> | TGGGACCTCTCCACCAGTT   | GTGGTGTTGAGGGCTTGG        |
| <i>Il1b</i>  | GCAACTGTTCTGAACTCAACT | ATCTTTTGGGGTCCGTCAACT     |
| <i>Lpl</i>   | TTCCAGCCAGGATGCAACA   | GGTCCACGTCTCCGAGTCC       |
| <i>Axl</i>   | GGAGGAGCCTGAGGACAAAGC | GACAGCATCTTGAAGCCAGAGTAGG |
| <i>Igf1</i>  | TTCAGTTCGTGTGTGGACCGA | ATCCACAATGCCTGTCTGAGG     |
| <i>Apoc1</i> | TTCAGTTCGTGTGTGGACCGA | ATCCACAATGCCTGTCTGAGG     |
| <i>Itgax</i> | ATGGAGCCTCAAGACAGGAC  | GGATCTGGGATGCTGAAATC      |
| <i>Ifnb1</i> | CAGCTCCAAGAAAGGACGAAC | GGCAGTGTA ACTCTTCTGCAT    |
